# Supplementary material for: Preparation of Porous Liquid Based on Silicalite-1
Source: PubMed Central journal article supplement (PMC6926578; doi:10.3390/ma12233984), 2019-12-01
Supplement: materials-12-03984-s001.pdf [file materials-12-03984-s001.pdf]

## Supporting Information

### Preparation of Porous Liquid based on Silicalite-1

Yutong Liu <sup>1,2</sup>, Yang Bai <sup>1</sup> and Tao Tian <sup>1,\*</sup>

<sup>1</sup> Key Laboratory of Groundwater Resources and Environment, Ministry of Education, College of Environment and Resource, Jilin University, Changchun 130012, China; tiantao@jlu.edu.cn

<sup>2</sup> Jilin Engineering Normal University; liuyt841011@163.com

\* Correspondence: tiantao@jlu.edu.cn

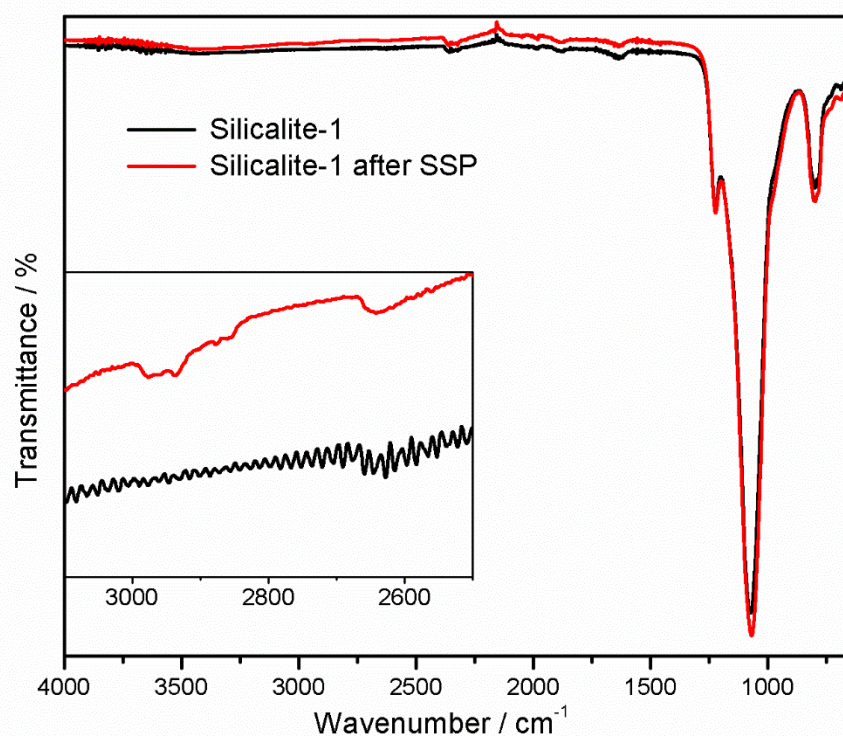

Figure S1. FT-IR spectra of S-1 and S-1 treated by SSP.

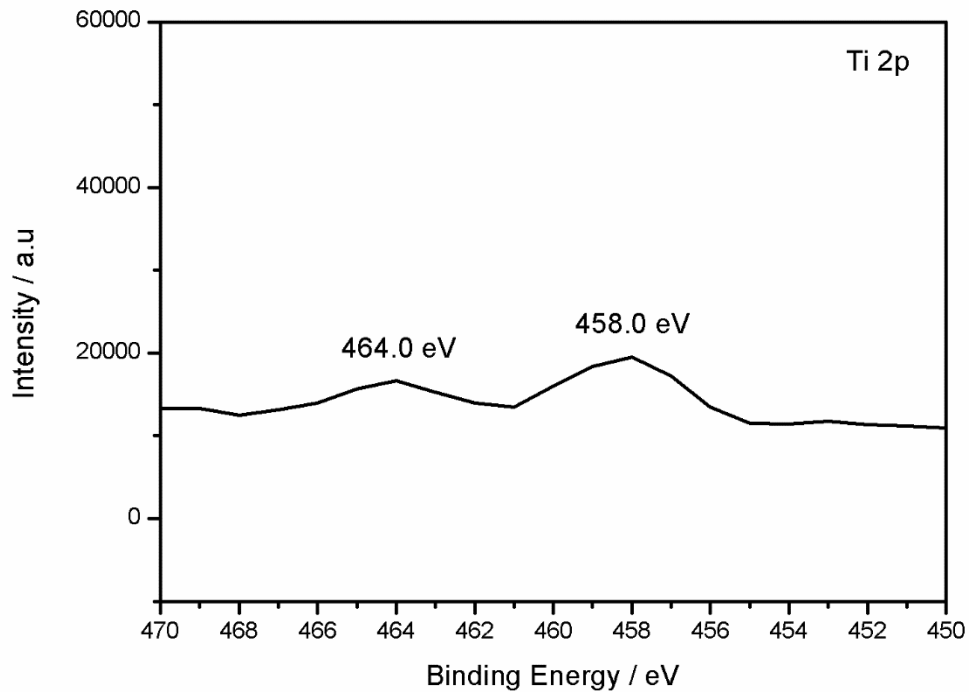

**Figure S2.** XPS spectra of the P<sub>2p</sub> region of S-1 treated by SSP.

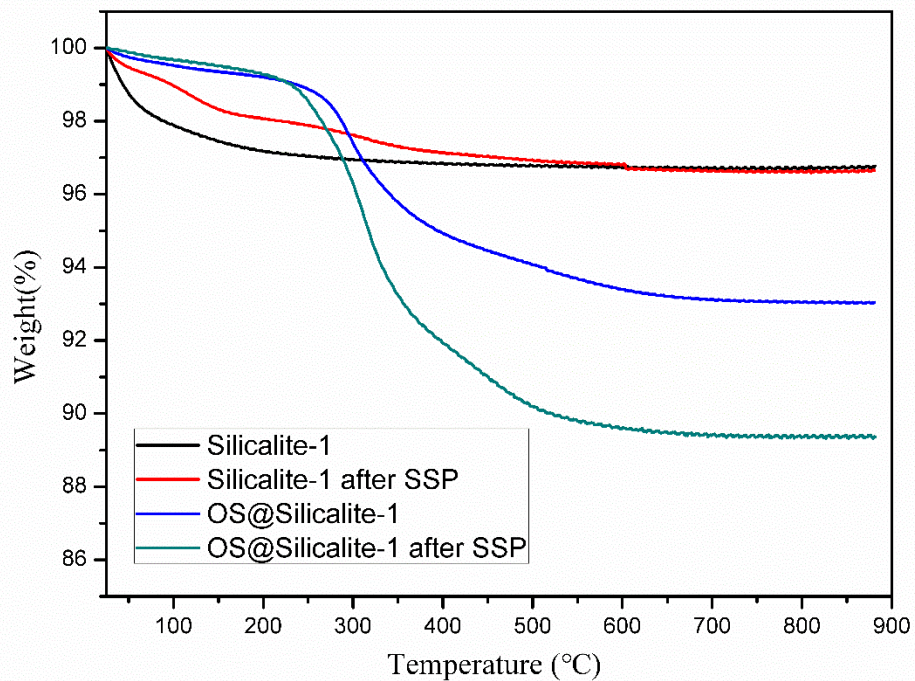

**Figure S3.** TGA trace of S-1, S-1 after SSP, OS@S-1 and OS@S-1 after SSP.

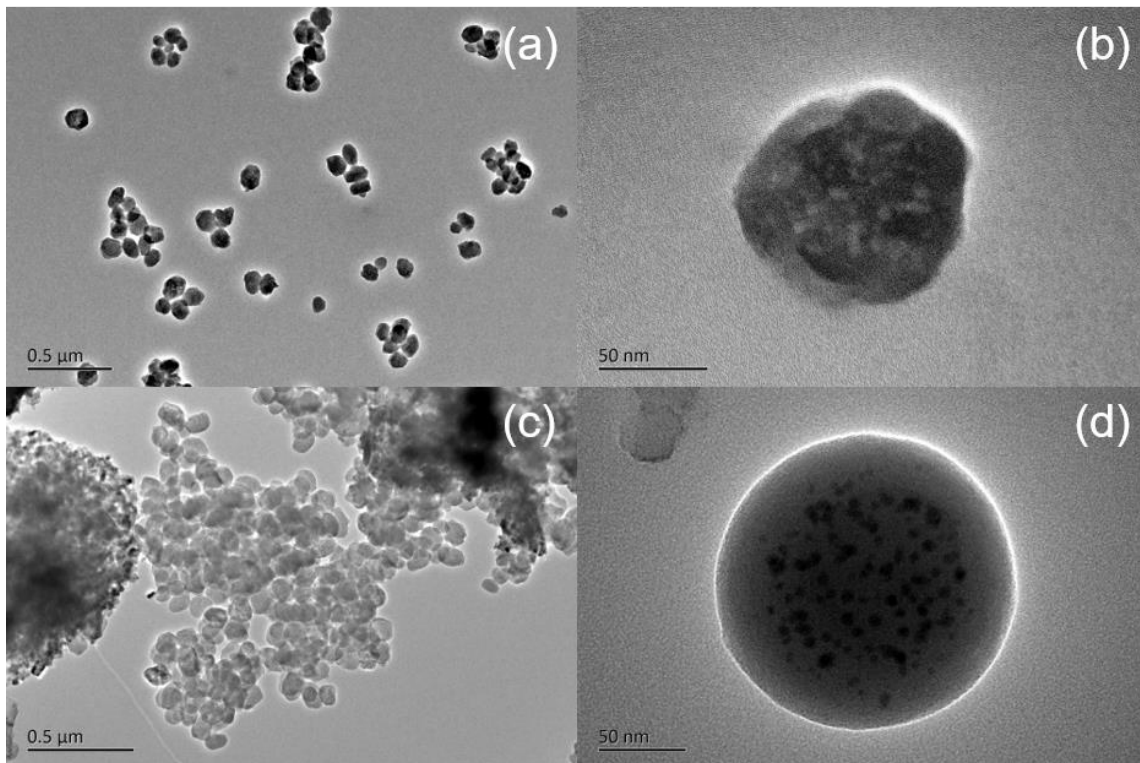

**Figure S4.** TEM images of S-1 (a, b) and OS@S-1 (c, d).
